# Supplementary material for: Binder-free V2O5-carbon nanotube composite films for high-performance aqueous manganese-ion batteries
Source: Royal Society of Chemistry journal article supplement (doi:10.1039/d5nr00074b), 2025-01-01
Supplement: d5nr00074b1.pdf [file d5nr00074b1.pdf]

## Supplementary Material

### **Binder-Free V<sub>2</sub>O<sub>5</sub>-Carbon Nanotube Composite Films for High-Performance Aqueous Manganese-Ion Batteries**

Jianan Zhao <sup>a</sup>, Xinyu Wang <sup>\*a</sup>, Xinqi Xie <sup>a</sup>, Hongmei Cao <sup>\*b</sup>

<sup>a</sup> *Department of Materials Science and Engineering, College of Transportation Engineering, Dalian Maritime University, Dalian, 116026, PR China.*

<sup>b</sup> *School of Energy and Power, Jiangsu University of Science and Technology, Zhenjiang, Jiangsu, 212003 PR China.*

<sup>\*</sup>Corresponding authors.

E-mail: wangxinyu@dlmu.edu.cn; caohm@just.edu.cn.

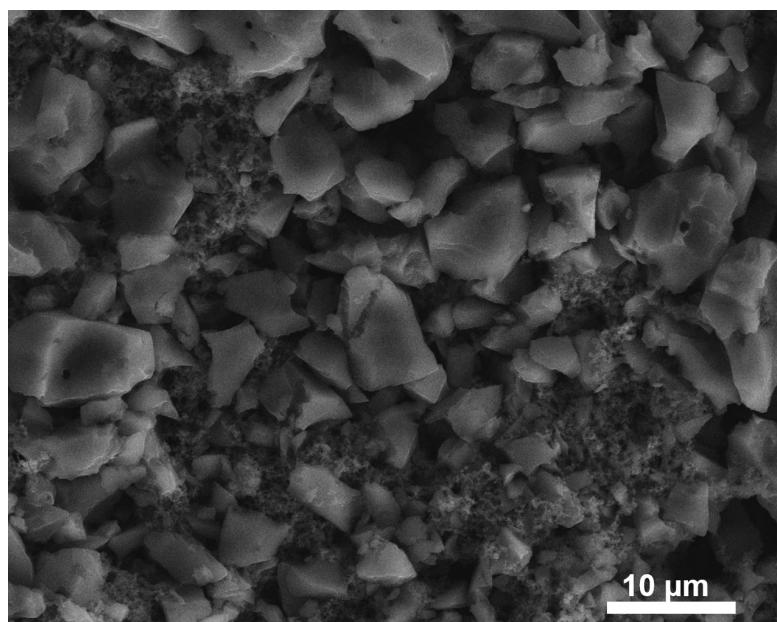

**Figure S1.** SEM image of AC electrode.

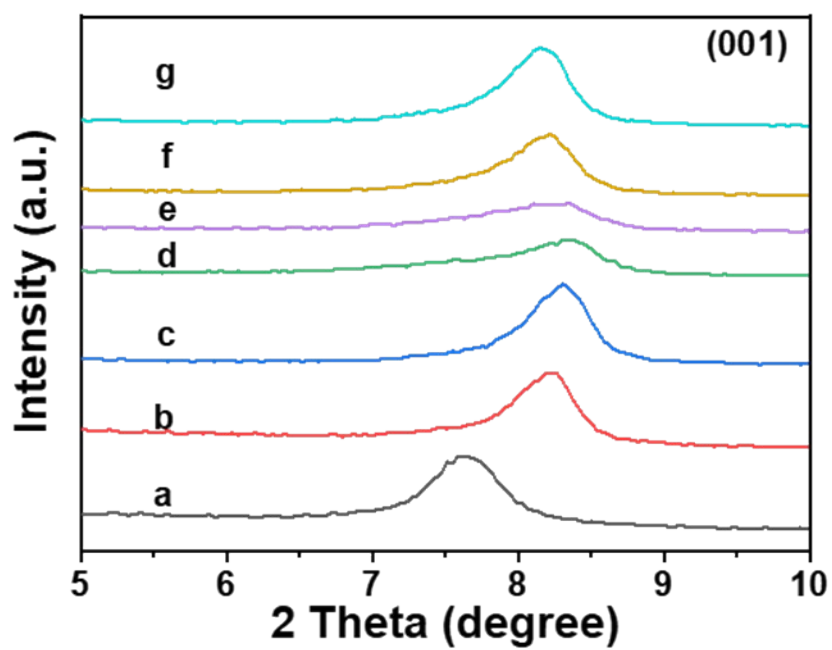

**Figure S2.** XRD patterns of the (001) plane at different charge/discharge states.

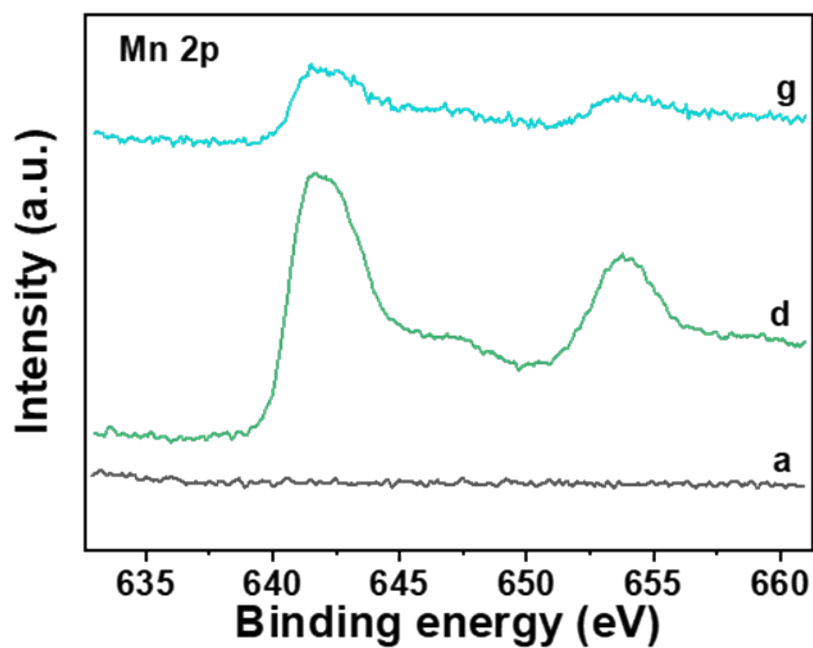

Figure S3. XPS spectra of Mn 2p at different charge/discharge states.

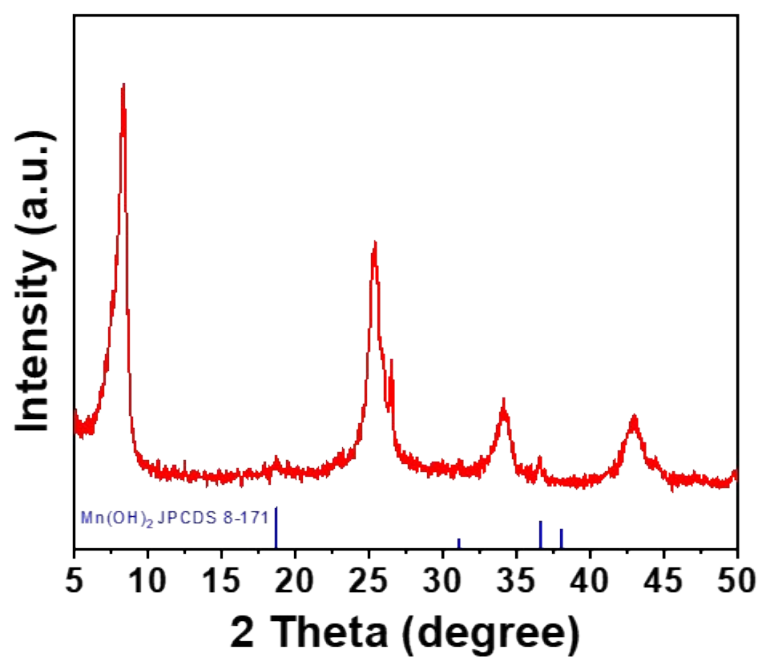

Figure S4. XRD patterns of the Mn(OH)<sub>2</sub>

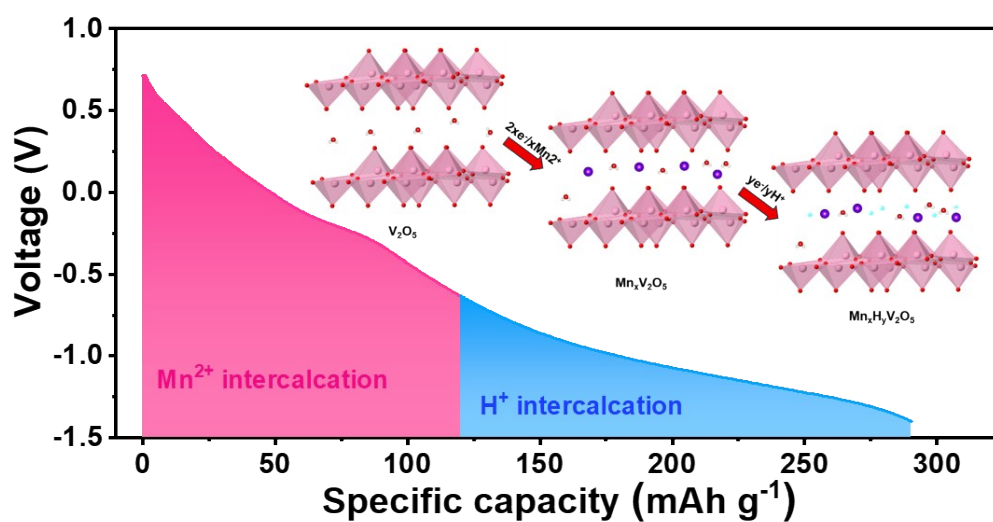

**Figure S5.** Schematic diagram of the discharging mechanism of VO-CNT cathode.

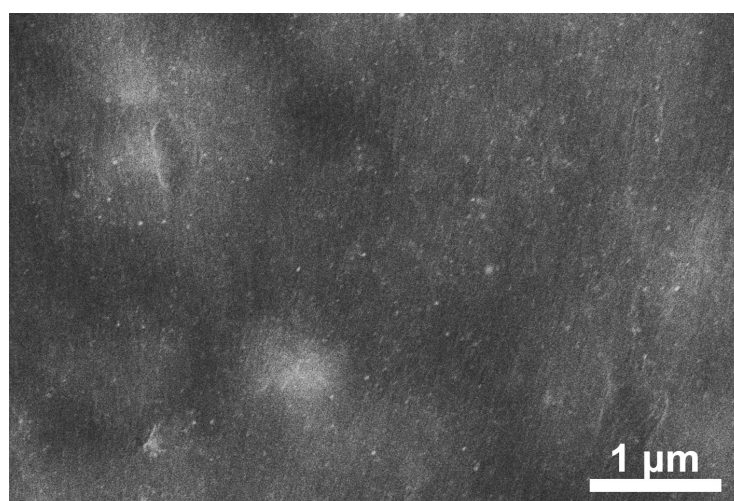

**Figure S6.** SEM images of the VO-CNT cathode at fully charged states after 100 cycles.

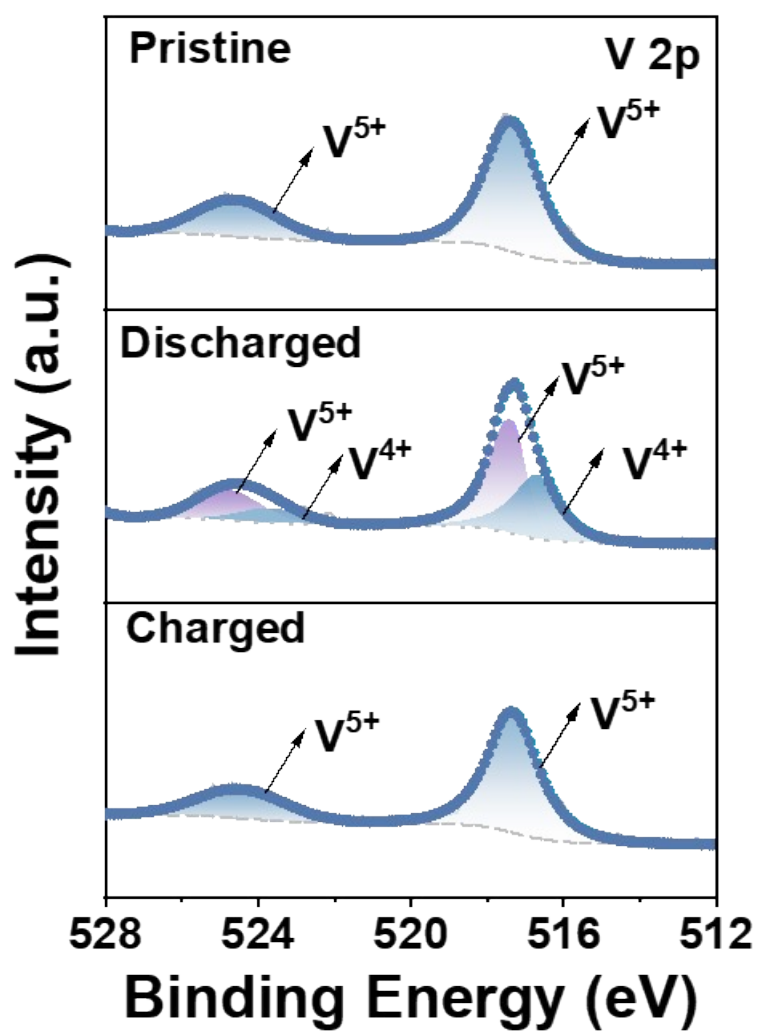

Figure S7. XPS V 2p spectra of VO-CNT cathode at the selected charge/discharge states.

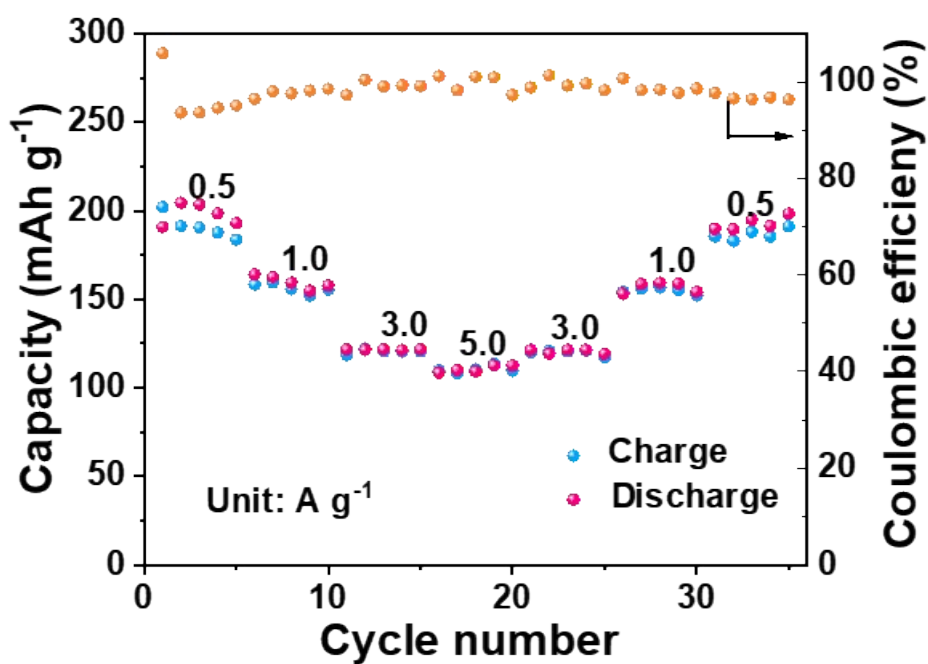

Figure S8. Rate capability of  $V_2O_5$  cathode.

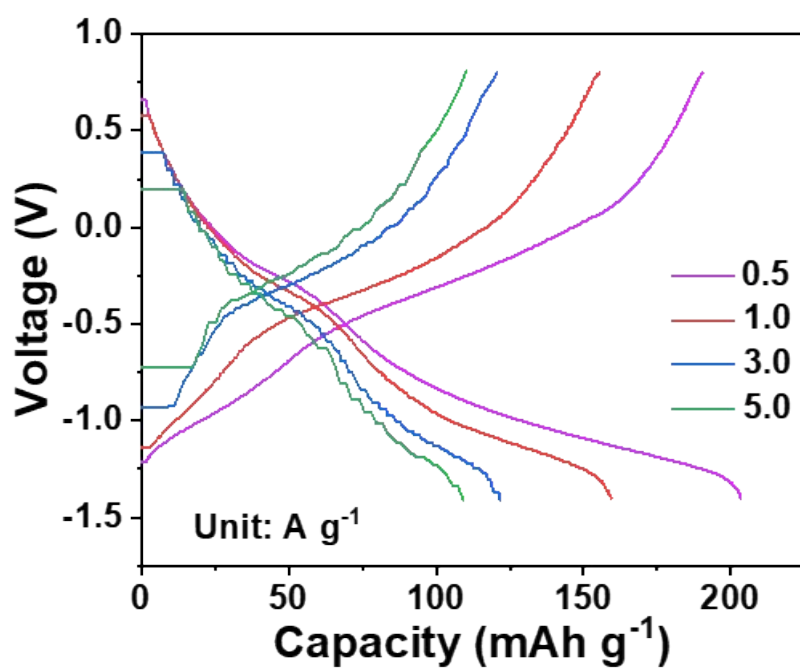

**Figure S9.** Discharge/charge profiles at various current densities of  $V_2O_5$  cathode.

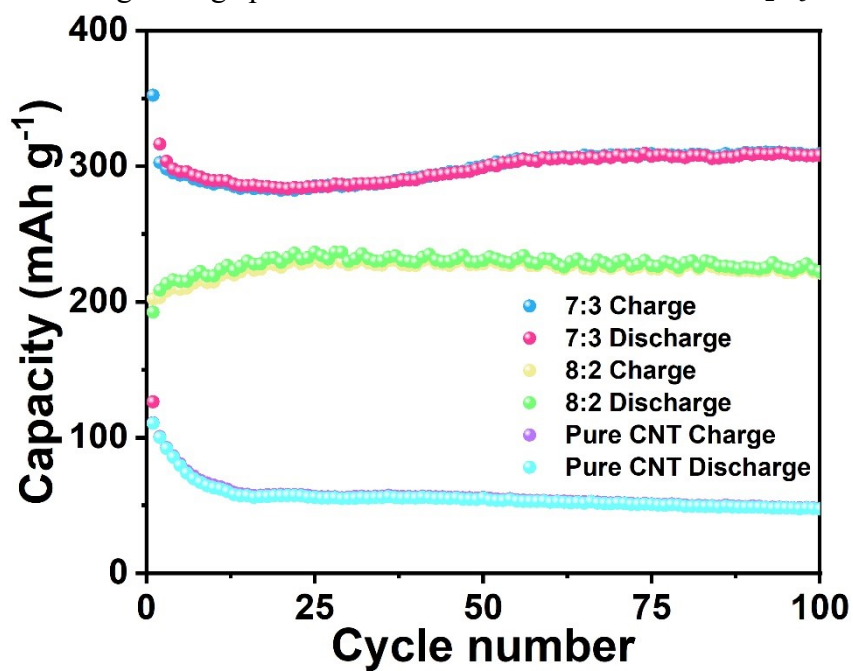

**Figure S10.** Cycling performance of VO-CNT films with different mass ratios at 1  $\text{A g}^{-1}$ .

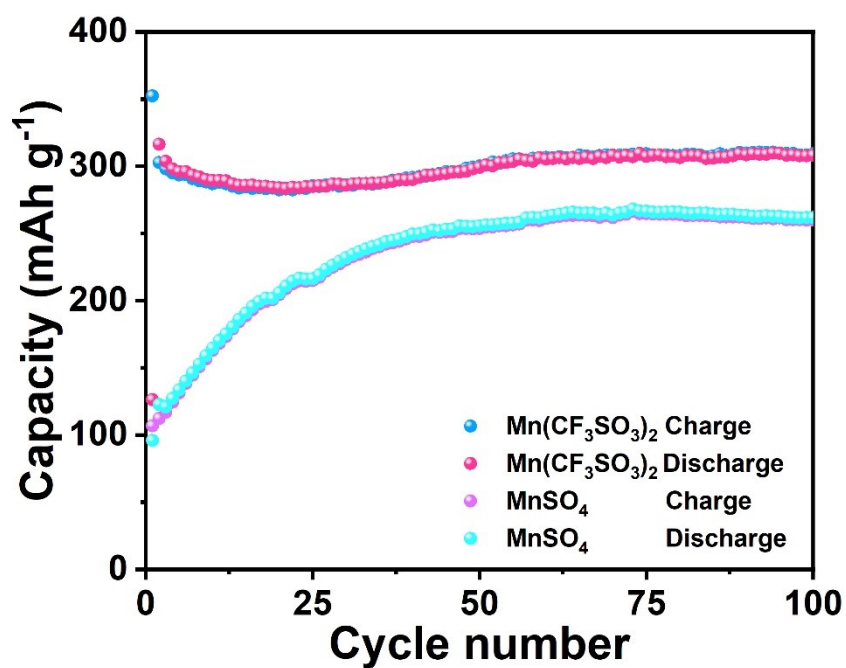

Figure S11. Cycling performance of VO-CNT films in different electrolytes at 1 A g<sup>-1</sup>.

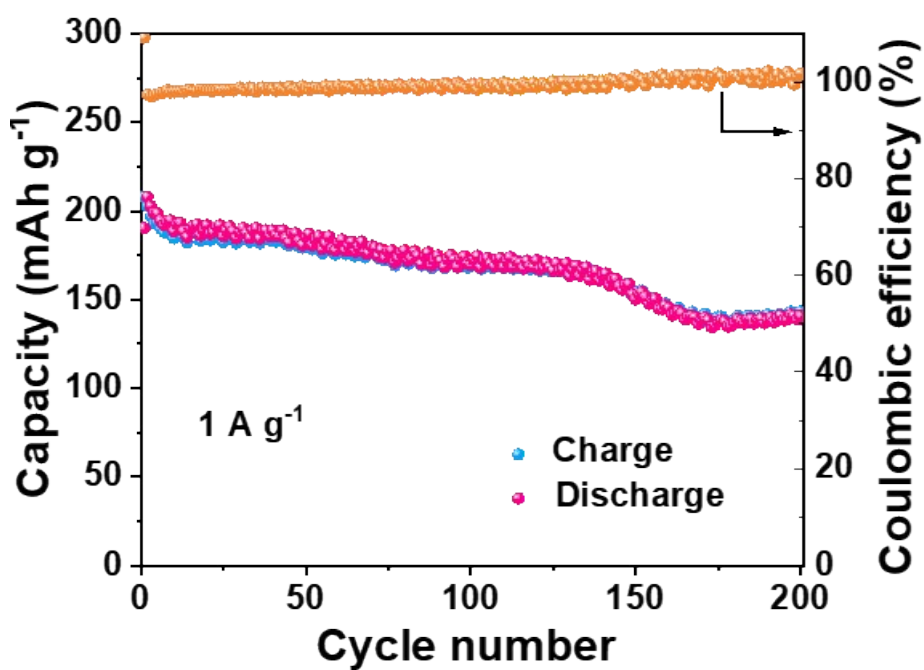

Figure S12. Cycling performance of V<sub>2</sub>O<sub>5</sub> cathode at 1.0 A g<sup>-1</sup>.

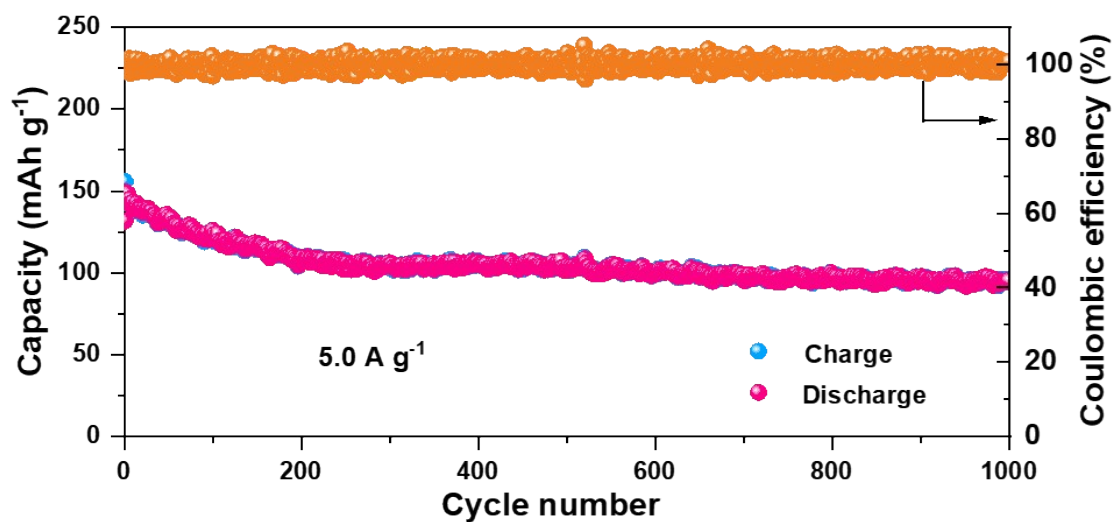

Figure S13. Cycling performance of  $\text{V}_2\text{O}_5$  cathode at  $5.0 \text{ A g}^{-1}$ .

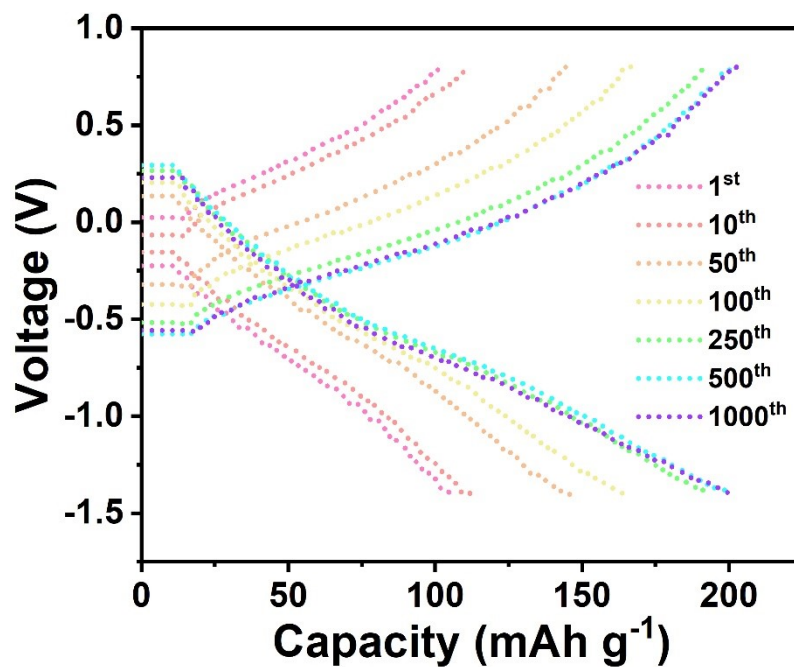

Figure S14. GCD curves of VO-CNT at different cycle numbers at  $5 \text{ A g}^{-1}$ .



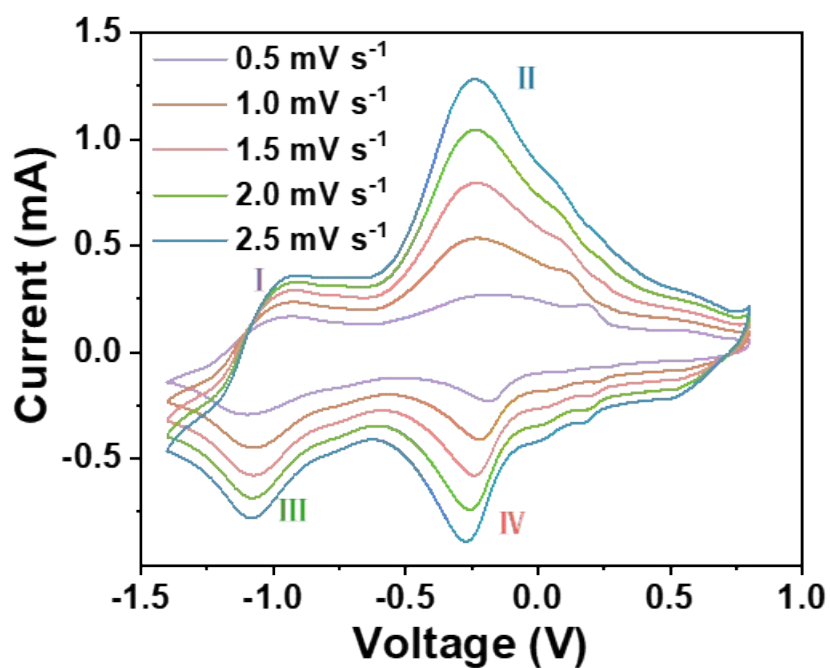

Figure S15. CV curves of  $V_2O_5$  cathode at different scan rates.

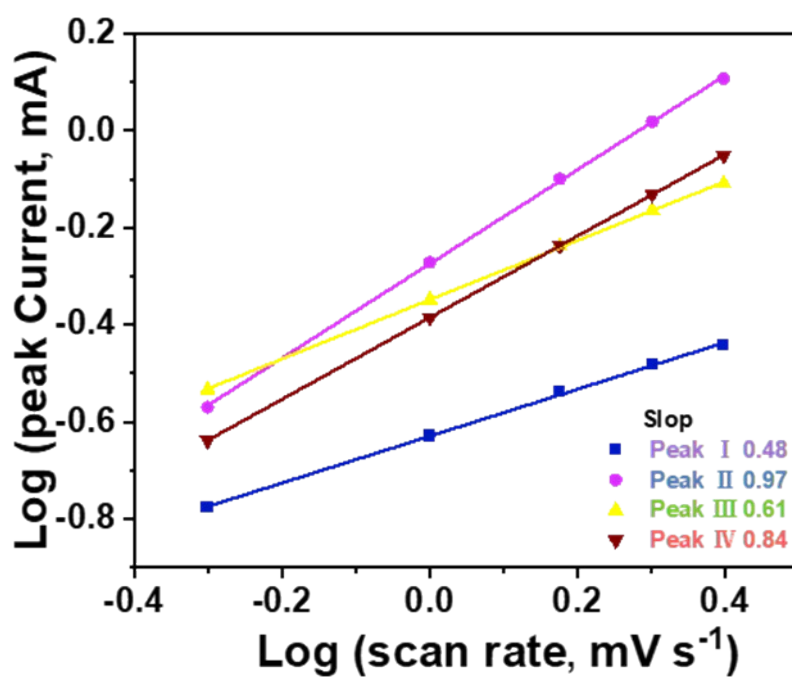

Figure S16. The corresponding plots of log (peak current) vs. log (scan rate) at each redox peak of  $V_2O_5$  cathode.

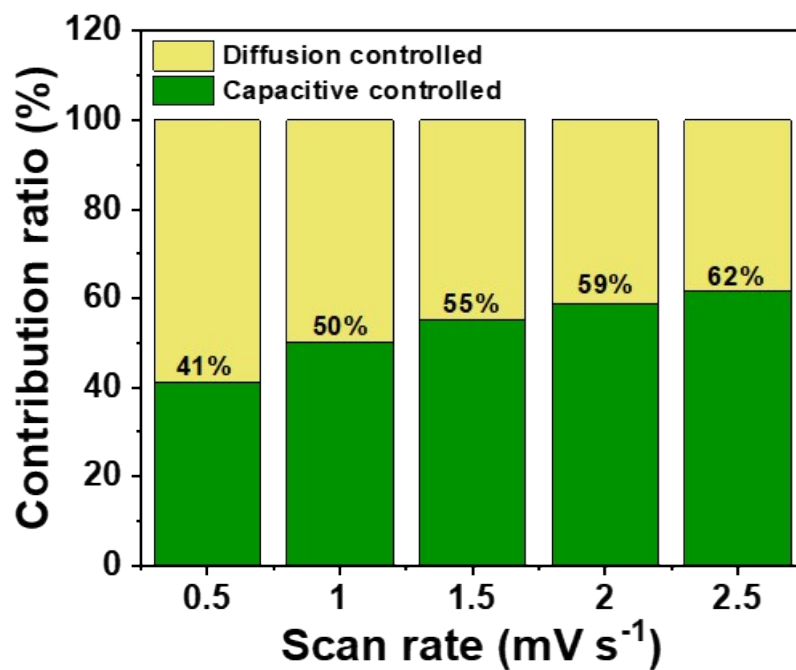

**Figure S17.** Capacitive contribution of  $V_2O_5$  cathode at different scan rates.

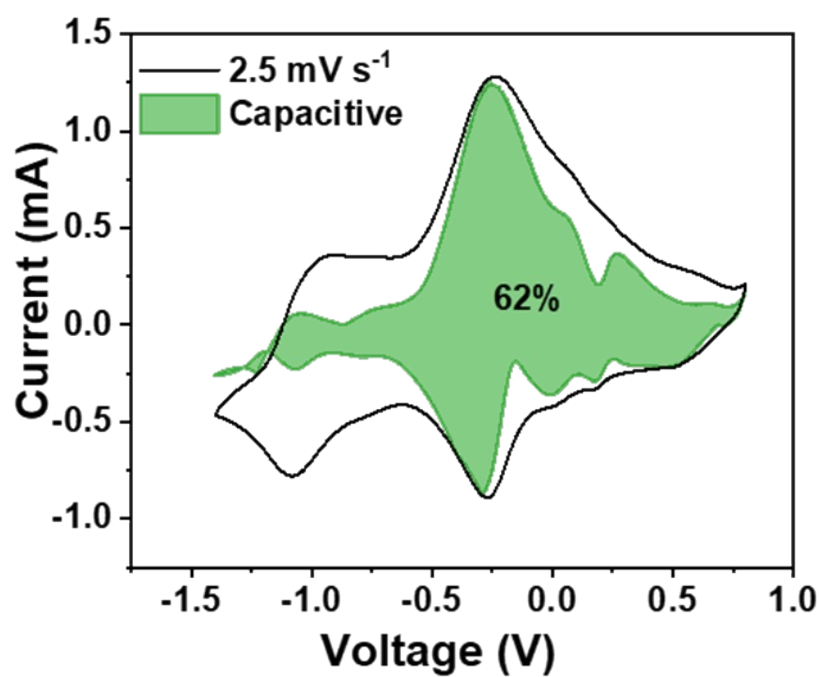

**Figure S18.** CV curve with a capacitive contribution of  $V_2O_5$  cathode at  $2.5 mV s^{-1}$ .

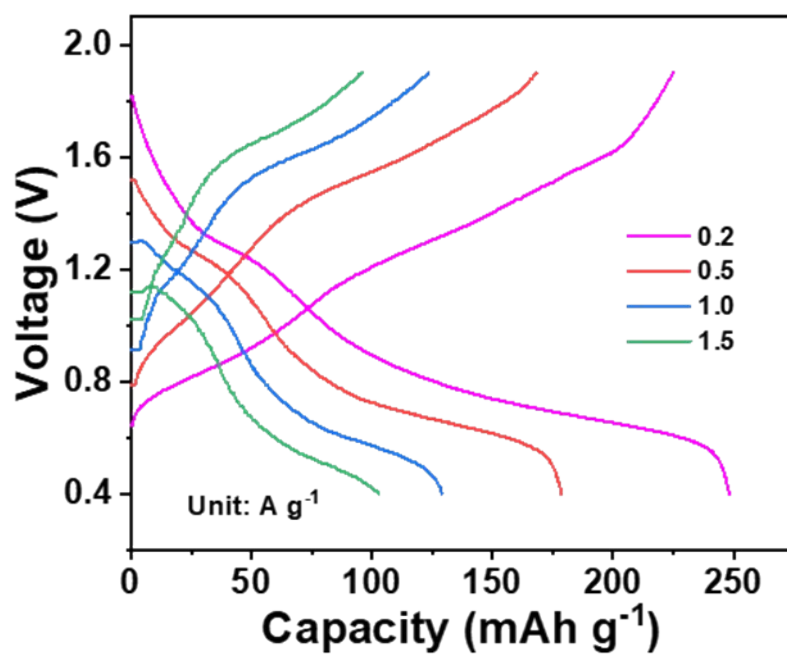

**Figure S19.** Discharge/charge profiles of  $V_2O_5$  cathode at various current densities.
